# Supplementary material for: Bioactive comparison of main components from unripe fruits of Rubus chingii Hu and identification of the effective component
Source: Royal Society of Chemistry journal article supplement (doi:10.1039/c5fo00406c), 2015-01-01
Supplement: c5fo00406c1.pdf [file c5fo00406c1.pdf]

1 **Supplement 1.** Box-Behnken central composite design for independent variables and their  
2 response

| Runs | A<br>extraction temperature<br>(°C ) | B<br>extraction time<br>(h) | C<br>ethanol concentration<br>(%) | D<br>liquid/solid ratio<br>(mL/g) | Yield<br>(%) |
|------|--------------------------------------|-----------------------------|-----------------------------------|-----------------------------------|--------------|
| 1    | 1 (80)                               | -1 (2)                      | 0 (30)                            | 0 (20)                            | 2.45         |
| 2    | 0 (70)                               | 0 (2.5)                     | 0 (30)                            | 0 (20)                            | 3.19         |
| 3    | 0 (70)                               | -1 (2)                      | -1 (20)                           | 0 (20)                            | 2.20         |
| 4    | -1 (60)                              | 1 (3)                       | 0 (30)                            | 0 (20)                            | 2.50         |
| 5    | 0 (70)                               | 0 (2.5)                     | 0 (30)                            | 0 (20)                            | 3.08         |
| 6    | 1 (80)                               | 0 (2.5)                     | -1 (20)                           | 0 (20)                            | 2.41         |
| 7    | 1 (80)                               | 0 (2.5)                     | 0 (30)                            | 1 (25)                            | 2.67         |
| 8    | -1 (60)                              | -1 (2)                      | 0 (30)                            | 0 (20)                            | 2.36         |
| 9    | -1 (60)                              | 0 (2.5)                     | 1 (40)                            | 0 (20)                            | 2.40         |
| 10   | 1 (80)                               | 0 (2.5)                     | 1 (40)                            | 0 (20)                            | 2.39         |
| 11   | 0 (70)                               | 0 (2.5)                     | 0 (30)                            | 0 (20)                            | 3.14         |
| 12   | -1 (60)                              | 0 (2.5)                     | 0 (30)                            | 1 (25)                            | 2.85         |
| 13   | 0 (70)                               | 0 (2.5)                     | -1 (20)                           | -1 (15)                           | 2.33         |
| 14   | -1 (60)                              | 0 (2.5)                     | 0 (30)                            | -1 (15)                           | 2.30         |
| 15   | 0 (70)                               | 1 (3)                       | 0 (30)                            | 1 (25)                            | 2.71         |
| 16   | -1 (60)                              | 0 (2.5)                     | -1 (20)                           | 0 (20)                            | 2.23         |
| 17   | 0 (70)                               | 0 (2.5)                     | 0 (30)                            | 0 (20)                            | 3.15         |
| 18   | 0 (70)                               | 0 (2.5)                     | 1 (40)                            | -1 (15)                           | 2.54         |
| 19   | 0 (70)                               | -1 (2)                      | 0 (30)                            | 1 (25)                            | 2.48         |
| 20   | 0 (70)                               | -1 (2)                      | 1 (40)                            | 0 (20)                            | 2.28         |
| 21   | 0 (70)                               | 0 (2.5)                     | -1 (20)                           | 1 (25)                            | 2.49         |
| 22   | 0 (70)                               | 1 (3)                       | 1 (40)                            | 0 (20)                            | 2.63         |
| 23   | 0 (70)                               | -1 (2)                      | 0 (30)                            | -1 (15)                           | 2.38         |
| 24   | 0 (70)                               | 1 (3)                       | 0 (30)                            | -1 (15)                           | 2.79         |
| 25   | 0 (70)                               | 0 (2.5)                     | 0 (30)                            | 0 (20)                            | 3.02         |
| 26   | 0 (70)                               | 0 (2.5)                     | 1 (40)                            | 1 (25)                            | 2.58         |
| 27   | 1 (80)                               | 1 (3)                       | 0 (30)                            | 0 (20)                            | 2.98         |
| 28   | 1 (80)                               | 0 (2.5)                     | 0 (30)                            | -1 (15)                           | 2.95         |
| 29   | 0 (70)                               | 1 (3)                       | -1 (20)                           | 0 (20)                            | 2.42         |
