# Supplementary material for: Bioactive comparison of main components from unripe fruits of Rubus chingii Hu and identification of the effective component
Source: Royal Society of Chemistry journal article supplement (doi:10.1039/c5fo00406c), 2015-01-01
Supplement: c5fo00406c2.pdf [file c5fo00406c2.pdf]

1 **Supplement 2.** ANOVA for regress equation

| Source          | Sum of Squares | Degree of freedom | Mean square | F-value | P-value Prob > F | Significant     |
|-----------------|----------------|-------------------|-------------|---------|------------------|-----------------|
| Model           | 2.54           | 14                | 0.18        | 35.40   | < 0.0001         | significant     |
| A-Temperature   | 0.12           | 1                 | 0.12        | 23.84   | 0.0002           | **              |
| B-Time          | 0.29           | 1                 | 0.29        | 57.55   | < 0.0001         | **              |
| C-Concentration | 0.046          | 1                 | 0.046       | 8.92    | 0.0098           | **              |
| D-Ration        | 0.020          | 1                 | 0.020       | 3.91    | 0.0680           |                 |
| AB              | 0.038          | 1                 | 0.038       | 7.43    | 0.0164           | *               |
| AC              | 9.025E-003     | 1                 | 9.025E-003  | 1.76    | 0.2054           |                 |
| AD              | 0.17           | 1                 | 0.17        | 33.65   | < 0.0001         | **              |
| BC              | 4.225E-003     | 1                 | 4.225E-003  | 0.83    | 0.3789           |                 |
| BD              | 8.100E-003     | 1                 | 8.100E-003  | 1.58    | 0.2289           |                 |
| CD              | 3.600E-003     | 1                 | 3.600E-003  | 0.70    | 0.4157           |                 |
| A <sup>2</sup>  | 0.44           | 1                 | 0.44        | 85.74   | < 0.0001         | **              |
| B <sup>2</sup>  | 0.58           | 1                 | 0.58        | 113.19  | < 0.0001         | **              |
| C <sup>2</sup>  | 1.37           | 1                 | 1.37        | 266.85  | < 0.0001         | **              |
| D <sup>2</sup>  | 0.23           | 1                 | 0.23        | 44.60   | < 0.0001         | **              |
| Residual        | 0.072          | 14                | 5.117E-003  |         |                  |                 |
| Lack of Fit     | 0.054          | 10                | 5.392E-003  | 1.22    | 0.4597           | not significant |
| Pure Error      | 0.018          | 4                 | 4.430E-003  |         |                  |                 |
| Cor Total       | 2.61           | 28                |             |         |                  |                 |

2 \*Significant (P < 0.05); \*\*extremely significant (P < 0.01).

3
